# Supplementary material for: Cytotoxicity profiling of choline chloride-based natural deep eutectic solvents
Source: Royal Society of Chemistry journal article supplement (doi:10.1039/d2ra07488e), 2023-01-01
Supplement: d2ra07488e1.pdf [file d2ra07488e1.pdf]

## Supplementary material

**Table S1.** Cytotoxic activity of the investigated NADES mixtures determined after 48h treatment by MTS assay expressed with EC<sub>50</sub> in mg/mL

| No | NADES system                 | EC <sub>50</sub> |       |       |       |
|----|------------------------------|------------------|-------|-------|-------|
|    |                              | Caco-2           | HT-29 | MCF-7 | MRC-5 |
| 1  | ChCl: CitA <sub>(1:1)</sub>  | 11.09            | 3.91  | 5.54  | 8.44  |
| 2  | ChCl: MalA <sub>(1:1)</sub>  | 11.19            | 4.40  | 5.71  | 5.23  |
| 3  | ChCl: LacA <sub>(1:1)</sub>  | 33.06            | 8.78  | 12.88 | 9.80  |
| 4* | ChCl: AscA <sub>(2:1)</sub>  | n.d.             | n.d.  | n.d.  | n.d.  |
| 5  | ChCl: Ur <sub>(1:1)</sub>    | 32.33            | 27.97 | 22.89 | 22.77 |
| 6  | ChCl: Gly <sub>(1:1)</sub>   | 46.63            | 45.60 | 31.46 | 23.94 |
| 7  | ChCl: Fru <sub>(1:1)</sub>   | 55.69            | 34.52 | 30.87 | 32.89 |
| 8  | ChCl: Sor <sub>(1:1)</sub>   | 36.53            | 29.77 | 42.07 | 26.20 |
| 9  | ChCl: 1,3PD <sub>(1:1)</sub> | 33.88            | 35.53 | 25.74 | 30.03 |
| 10 | ChCl: 1,2PD <sub>(1:1)</sub> | 34.69            | 32.77 | 33.45 | 30.17 |
| 11 | ChCl: 1,3BD <sub>(1:1)</sub> | 34.63            | 34.11 | 27.66 | 25.37 |
| 12 | ChCl: 1,4BD <sub>(1:1)</sub> | 36.41            | 33.66 | 33.55 | 25.96 |
| 13 | DMSO                         | ~145.86          | 32.78 | 46.75 | 47.96 |

\* EC<sub>50</sub> values for ascorbic acid-based system were not reproducible, and therefore EC<sub>50</sub> was not presented in the table

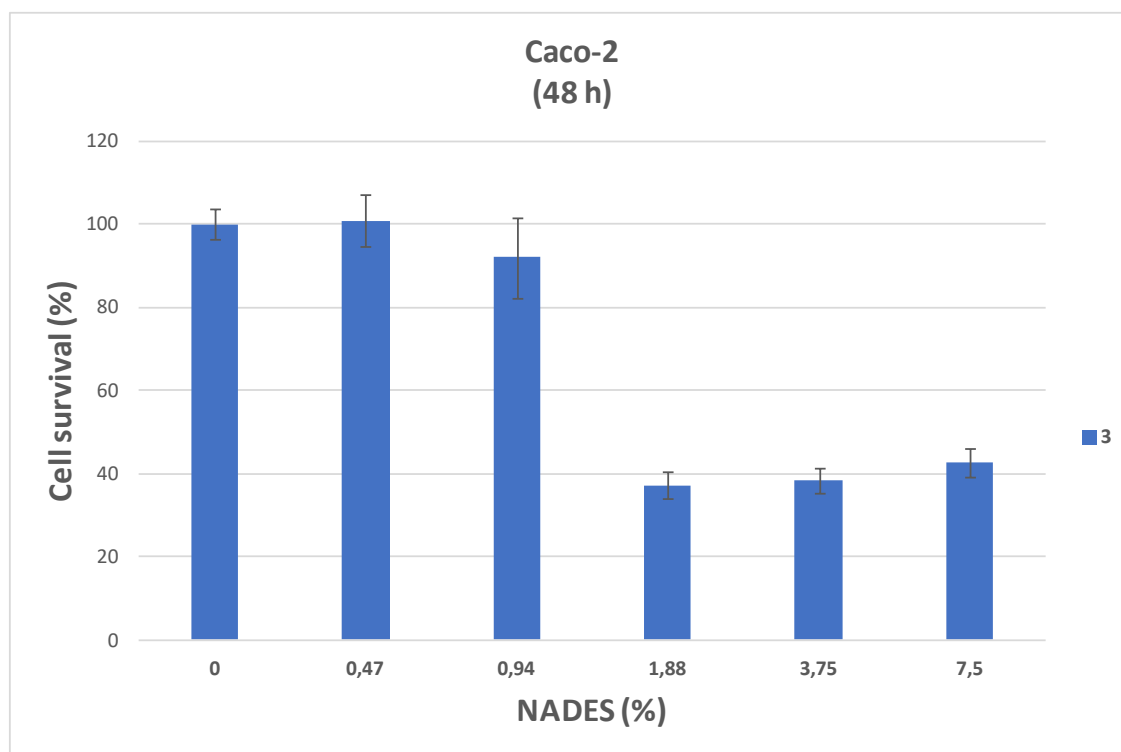

Figure S1. The effect of ChCl:LacA<sub>(1:1)</sub> system on cell viability of Caco-2 cell line shown in different volume ratios of NADES (%) (v/v)

## Dose-response curves of representative experiments

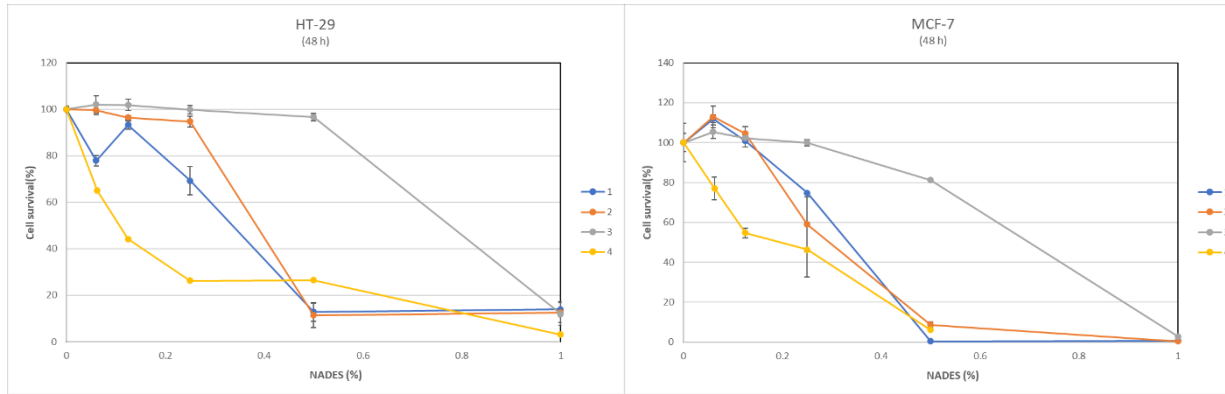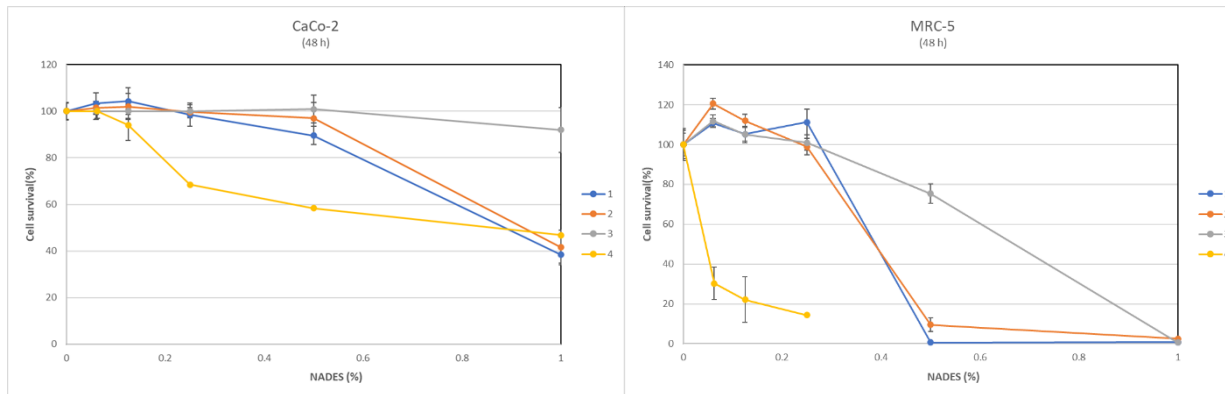



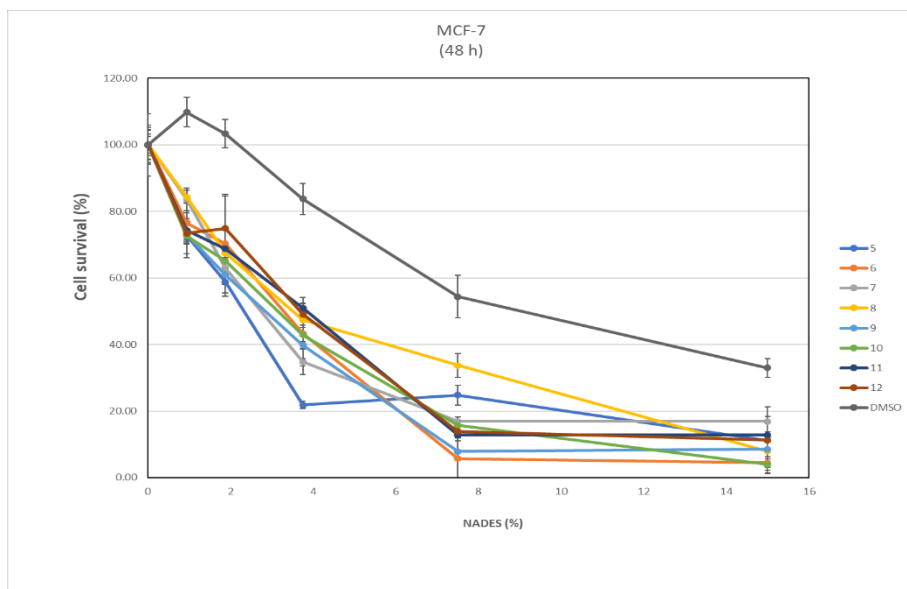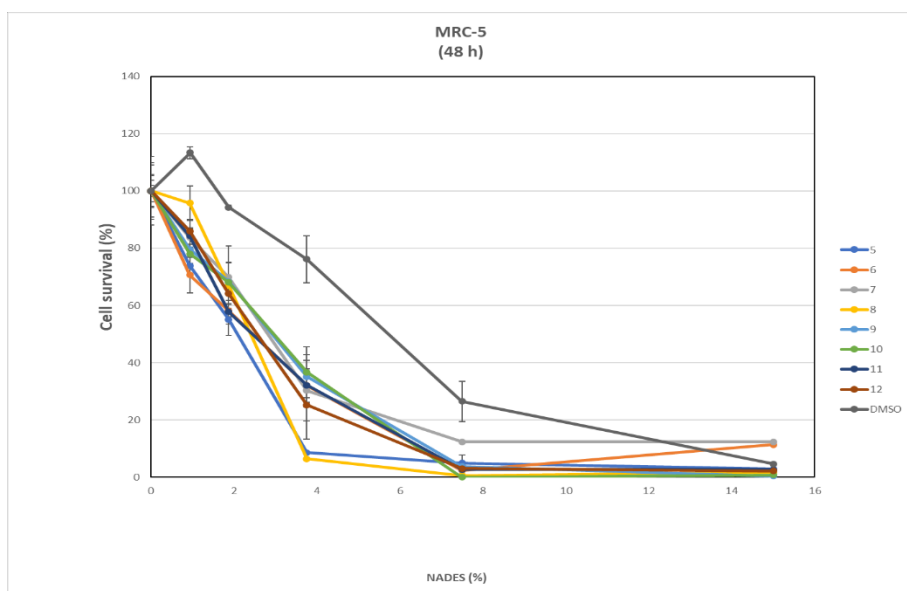

Figure S2. Results of cytotoxicity studies shown as dose-response curves of representative experiments.
